# Supplementary material
Source: PubMed Central journal article supplement (PMC2813978)

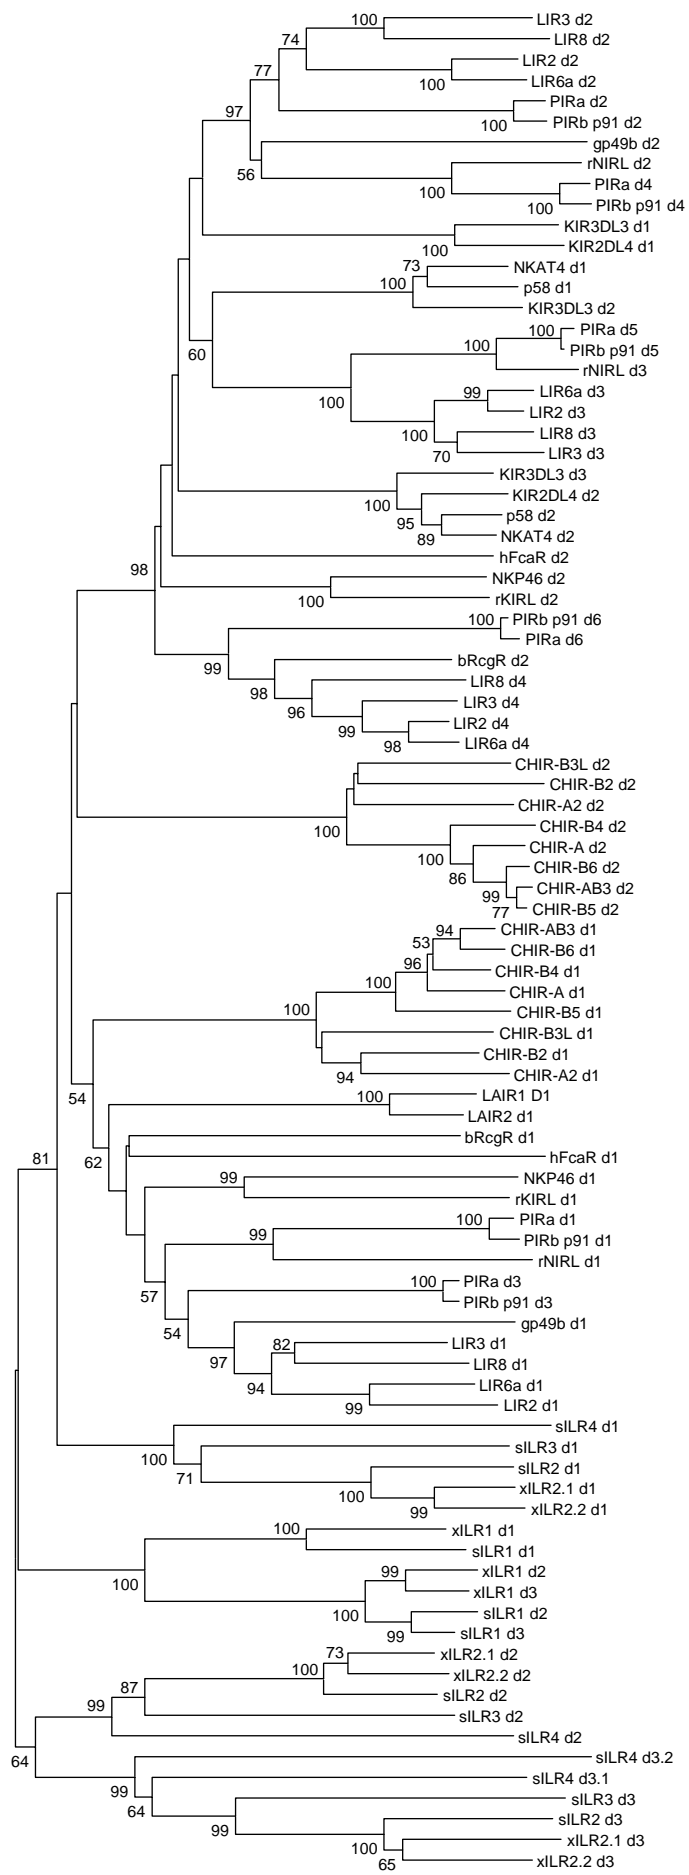

Supplement: NIHMS158248-supplement-01.pdf [file NIHMS158248-supplement-01.pdf]
